# Supplementary figures and images for: Synthetic chemistry-led creation of a difluorinated biaryl ether non-nucleoside reverse transcriptase inhibitor
Source: Royal Society of Chemistry journal article supplement (doi:10.1039/b714091f), 2007-01-01

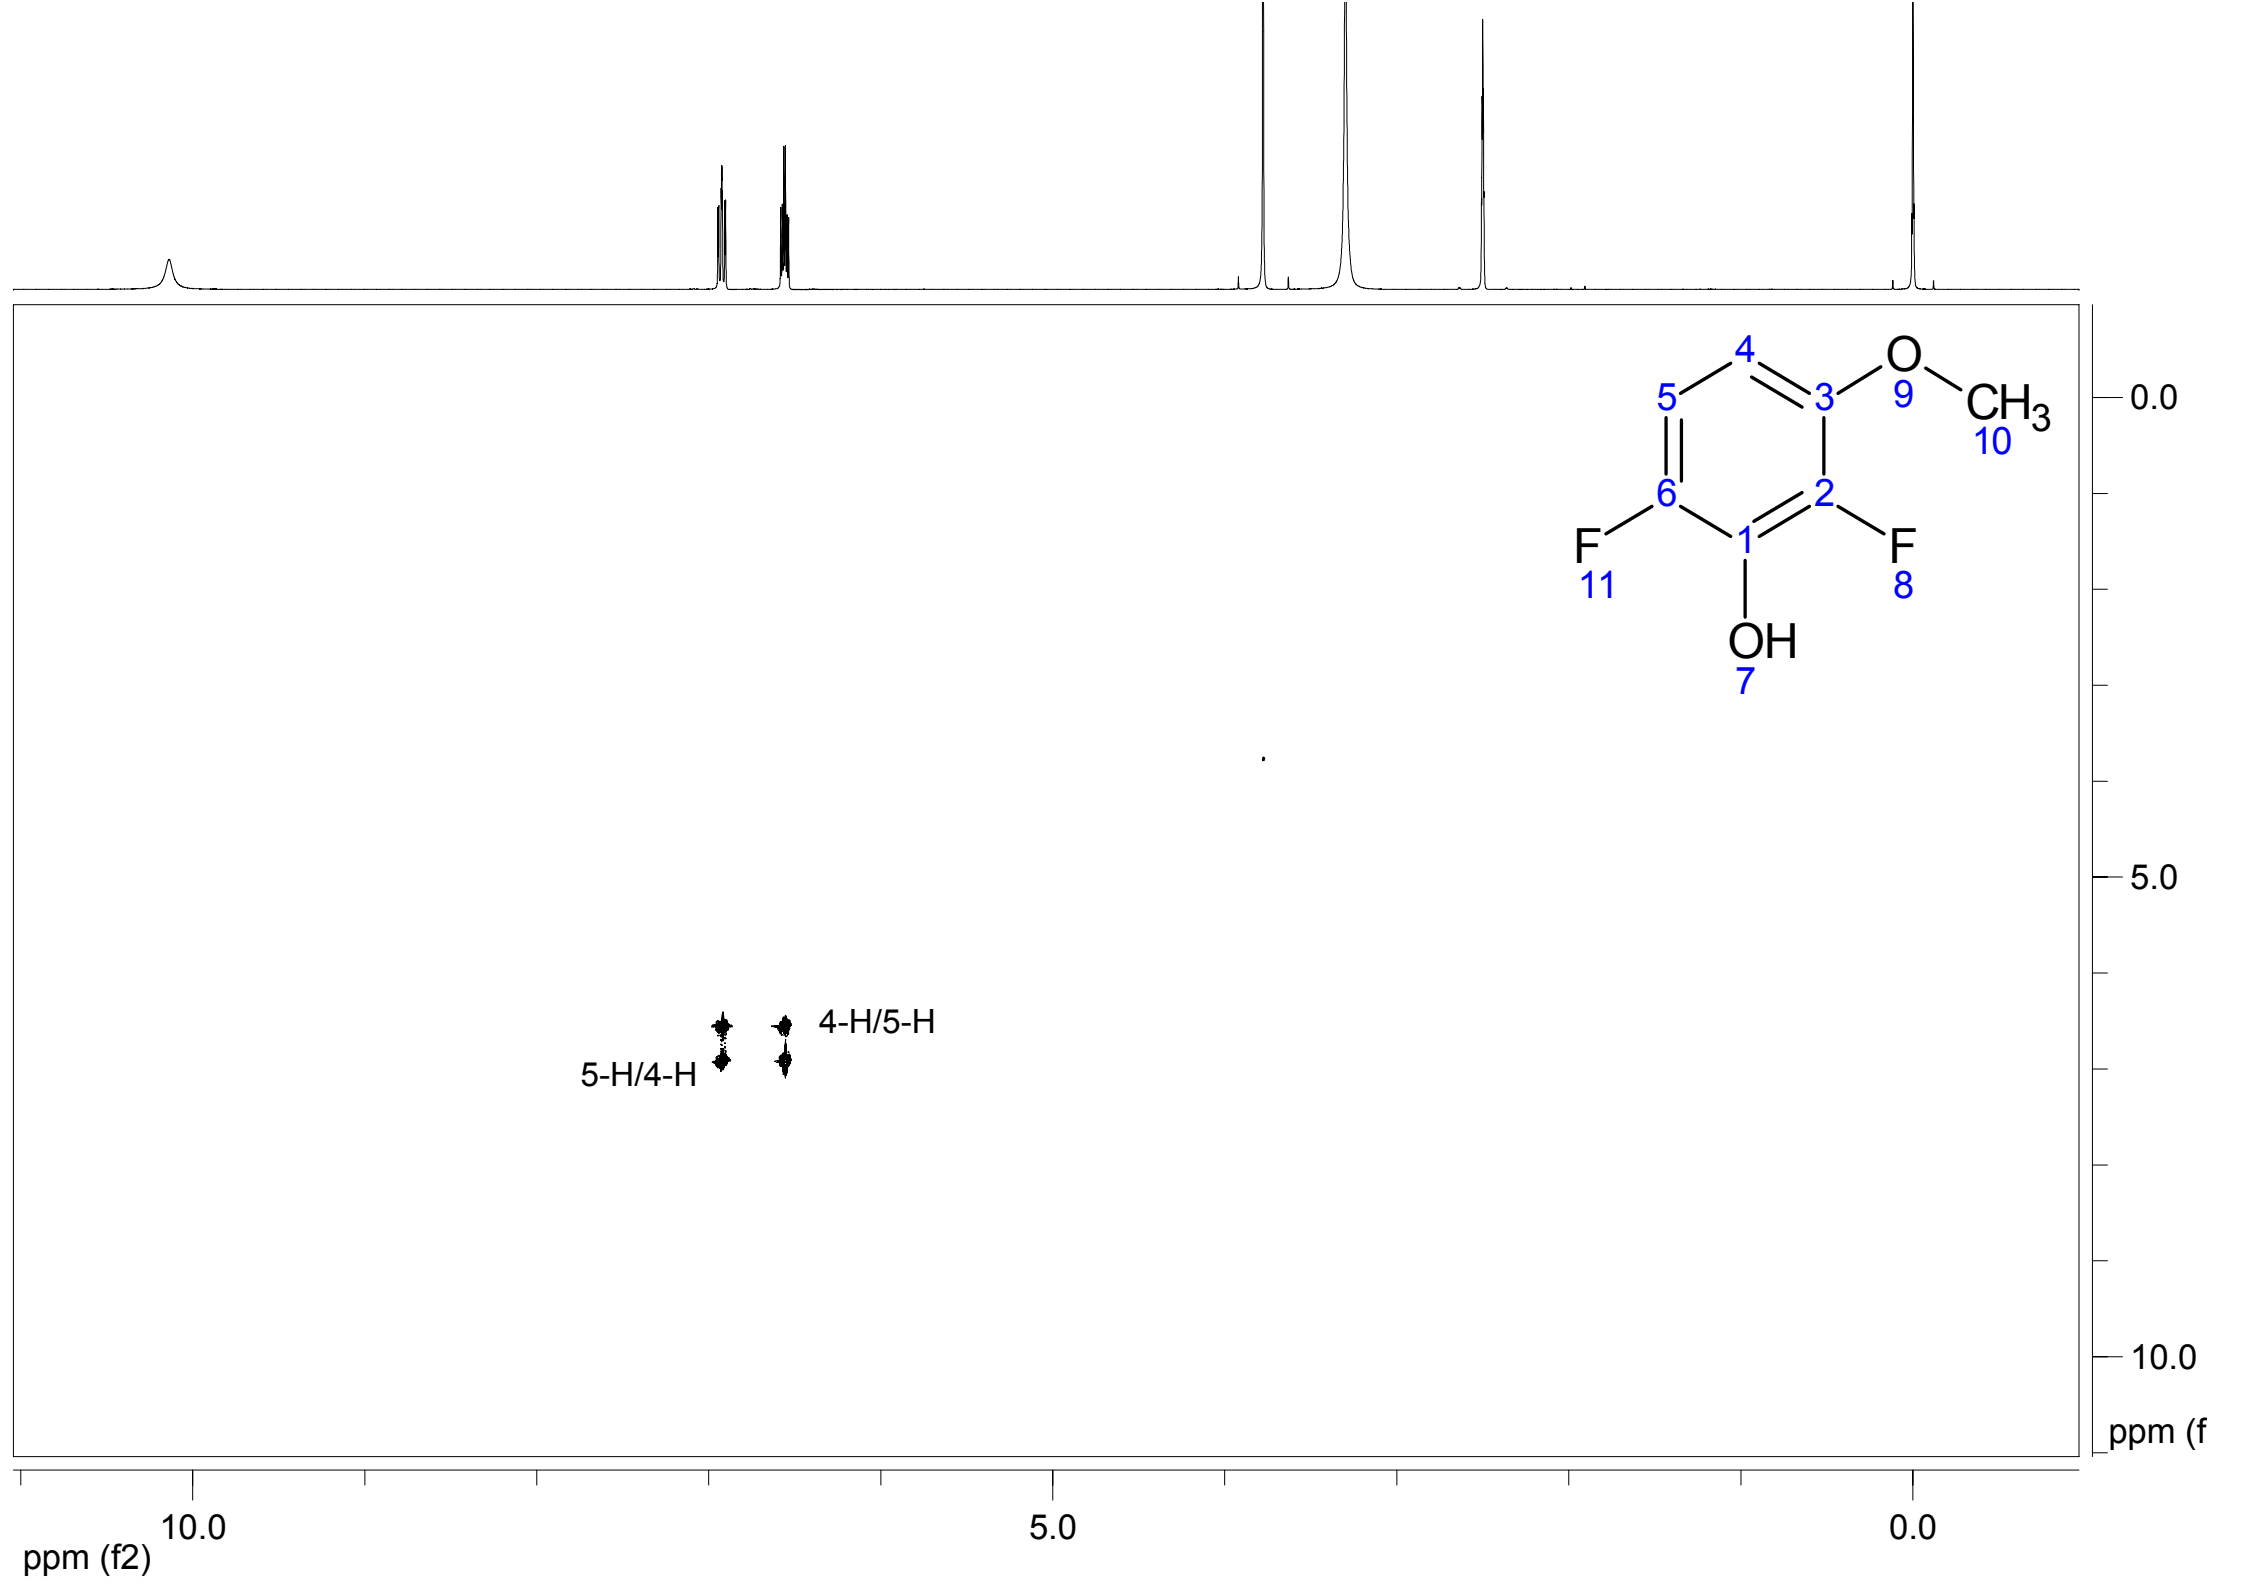

Supplement: b714091f_2.pdf [file b714091f_2.pdf]
